# Supplementary material for: Single cell detection using a glass-based optofluidic device fabricated by femtosecond laser pulses
Source: Royal Society of Chemistry journal article supplement (doi:10.1039/b808366e), 2008-10-23
Supplement: b808366e.pdf [file b808366e.pdf]

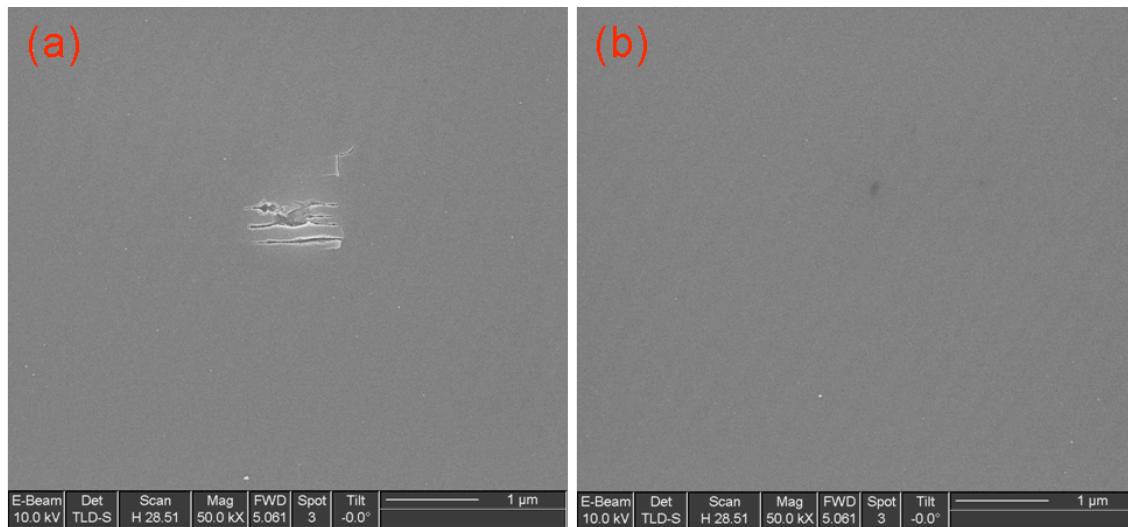

Figure 1 SEM photos of the junction region between the microchannel and optical waveguide written by (a) pulse energy of 84 nJ and scan speed of 10 μm/s without gap distance from the surface (b) pulse energy of 84 nJ and scan speed of 10 μm/s with 10 μm gap distance from the surface

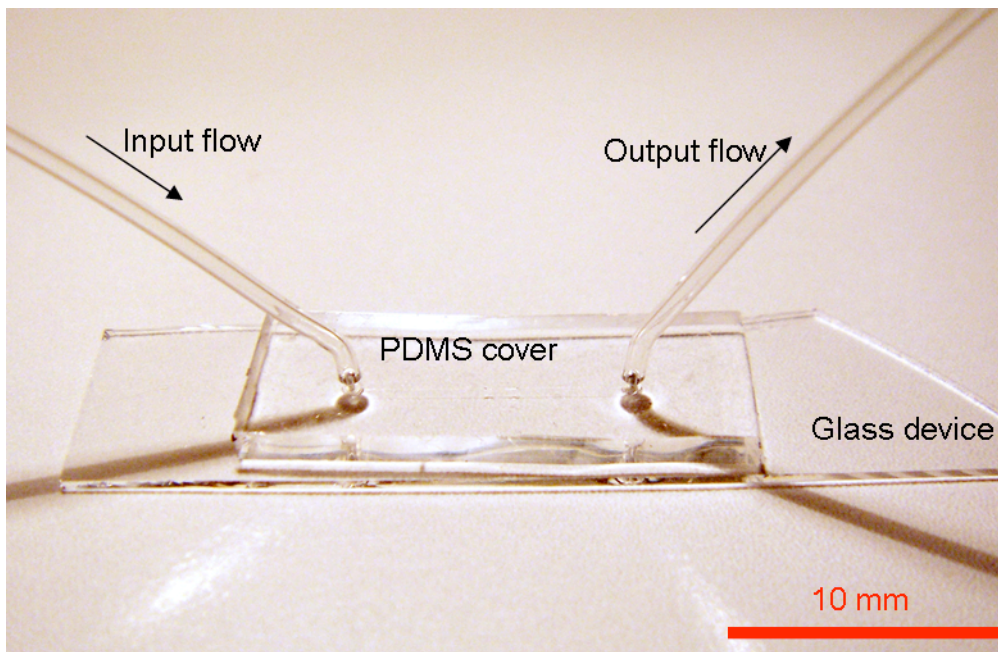

Figure 2 The final device bonded with PDMS cover with two holes for input and output fluidic connection

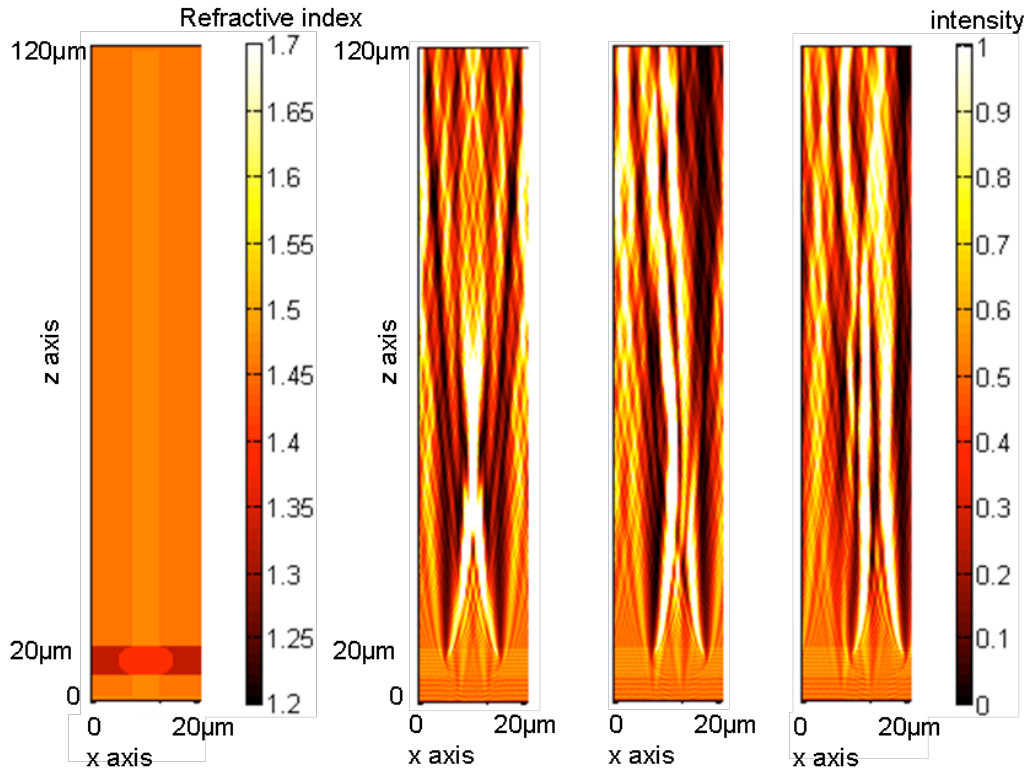

Figure 3 (a) 2D simulated geometric map of refractive indexes of the optofluidic device with a RBC between probing and collecting waveguide in 5  $\mu\text{m}$  microchannel (cell position  $x=10\mu\text{m}$ ). Calculated intensity profiles of different cell positions are presented at (b)  $x=10\mu\text{m}$  (c)  $x=12\mu\text{m}$  (d)  $x=14\mu\text{m}$
